# Supplementary material for: Prevalence and Associated Risk Factors of Intestinal Parasites and Enteric Bacterial Infections among Selected Region Food Handlers of Ethiopia during 2014–2022: A Systematic Review and Meta-Analysis
Source: Hindawi journal article supplement (doi:10.1155/2022/7786036), 2022-10-12
Supplement: f1 [file 7786036.f1.zip]

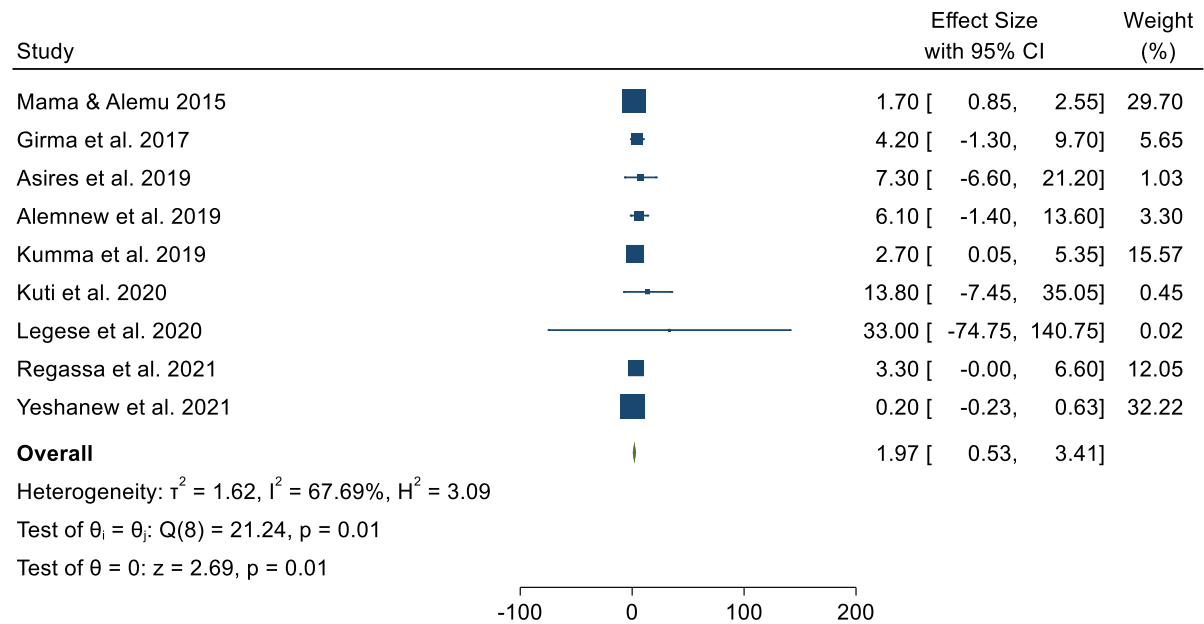

Random-effects REML model

**S7:** Hand washing habit before food handling as an associated risk factor for IPs and EBIs among food handlers
