# Supplementary figures and images for: Prevalence and Associated Risk Factors of Intestinal Parasites and Enteric Bacterial Infections among Selected Region Food Handlers of Ethiopia during 2014–2022: A Systematic Review and Meta-Analysis
Source: Hindawi journal article supplement (doi:10.1155/2022/7786036), 2022-10-12

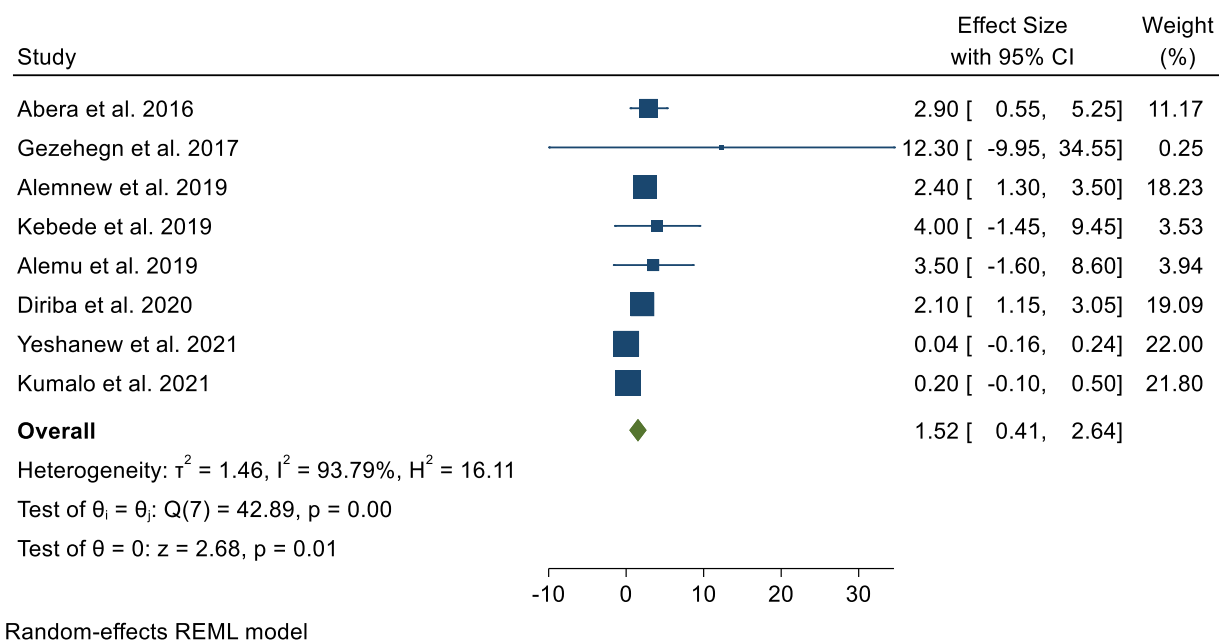

## S6: Medical check-up as an associated risk factor for IPs and EBIs among food handlers

Supplement: f1 [file 7786036.f1.zip]

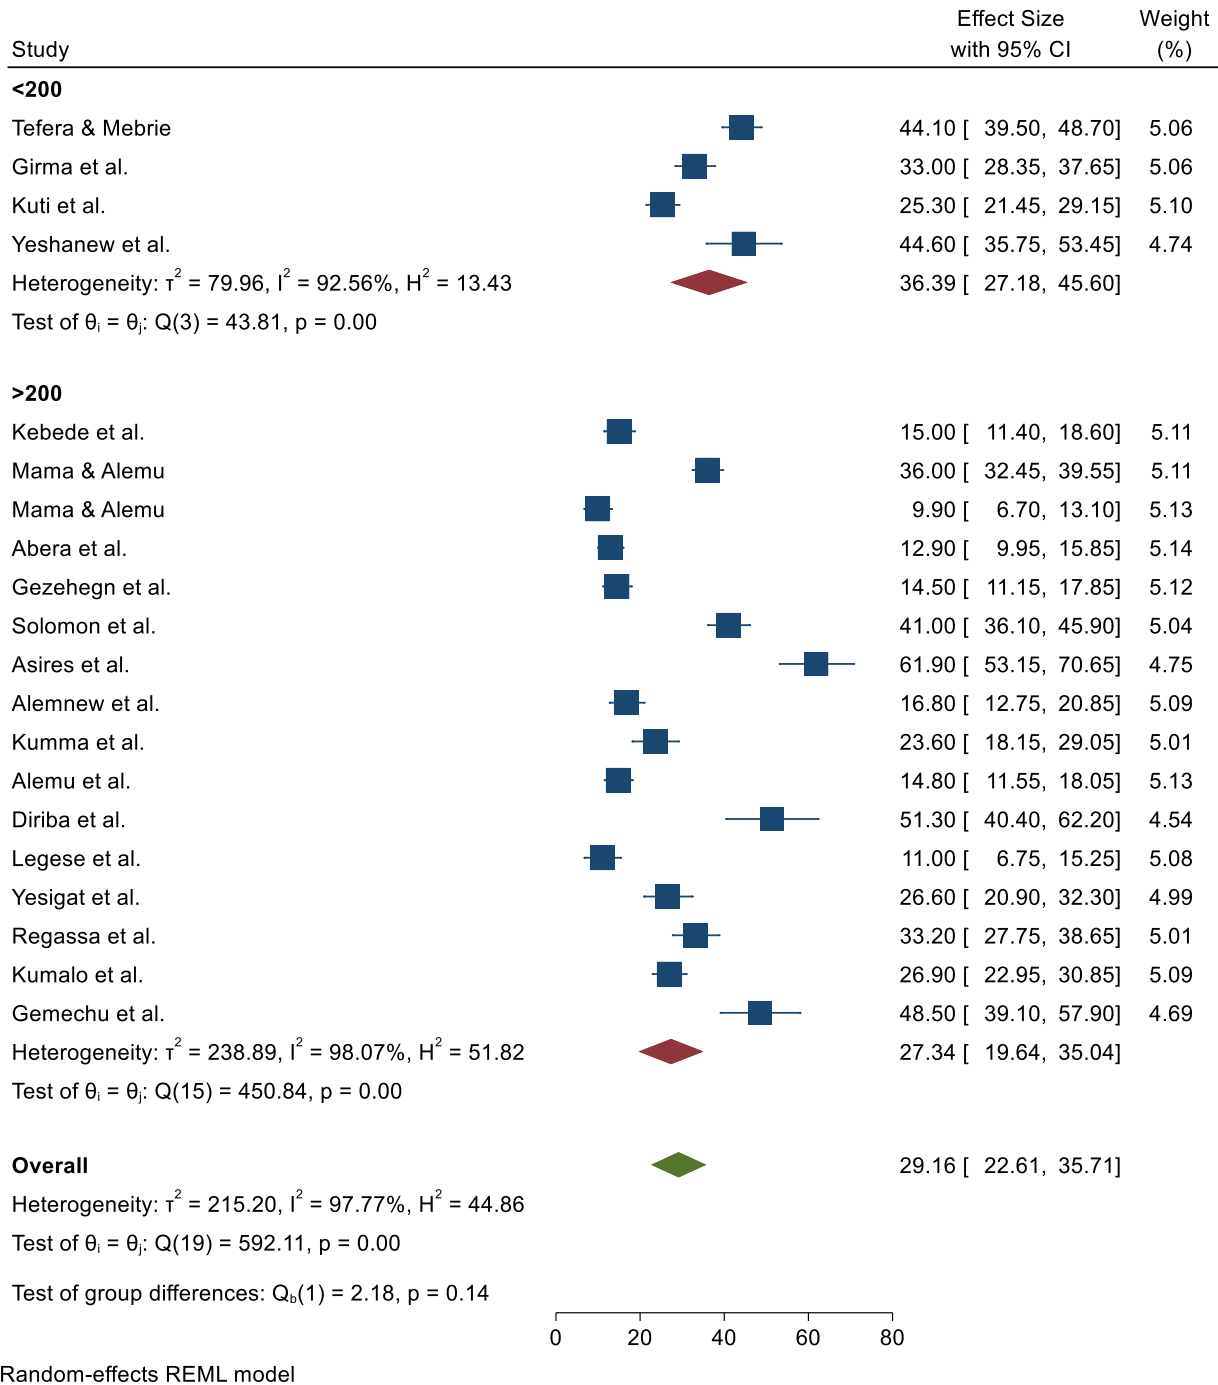

**S1:** Pooled prevalence of IPs and EBIs among food handlers by sample size.

Supplement: f1 [file 7786036.f1.zip]

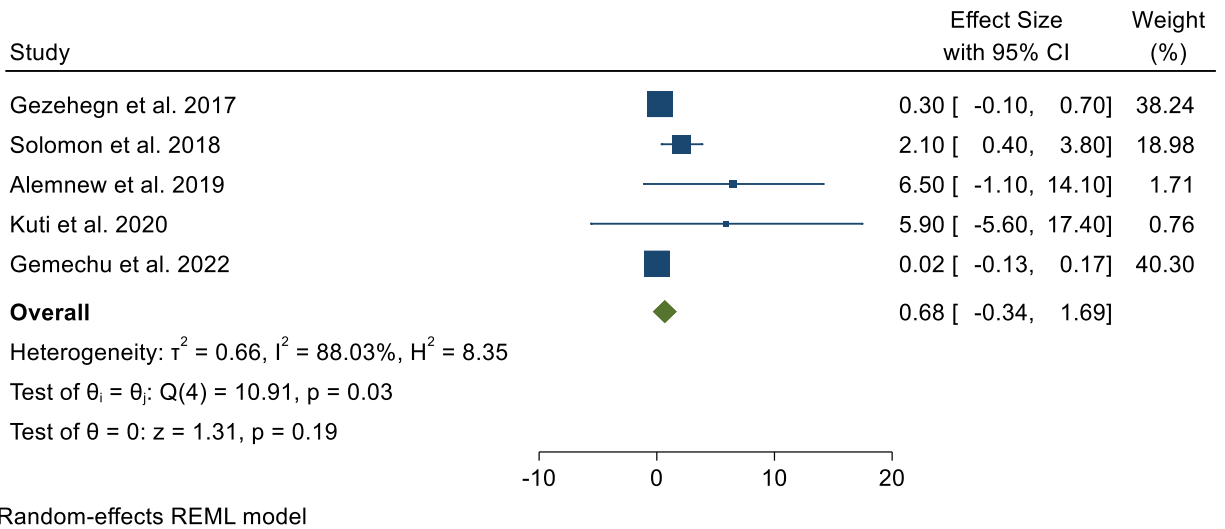

#### S4: Food hygiene training as an associated risk factor for IPs and EBIs among food handlers

Supplement: f1 [file 7786036.f1.zip]

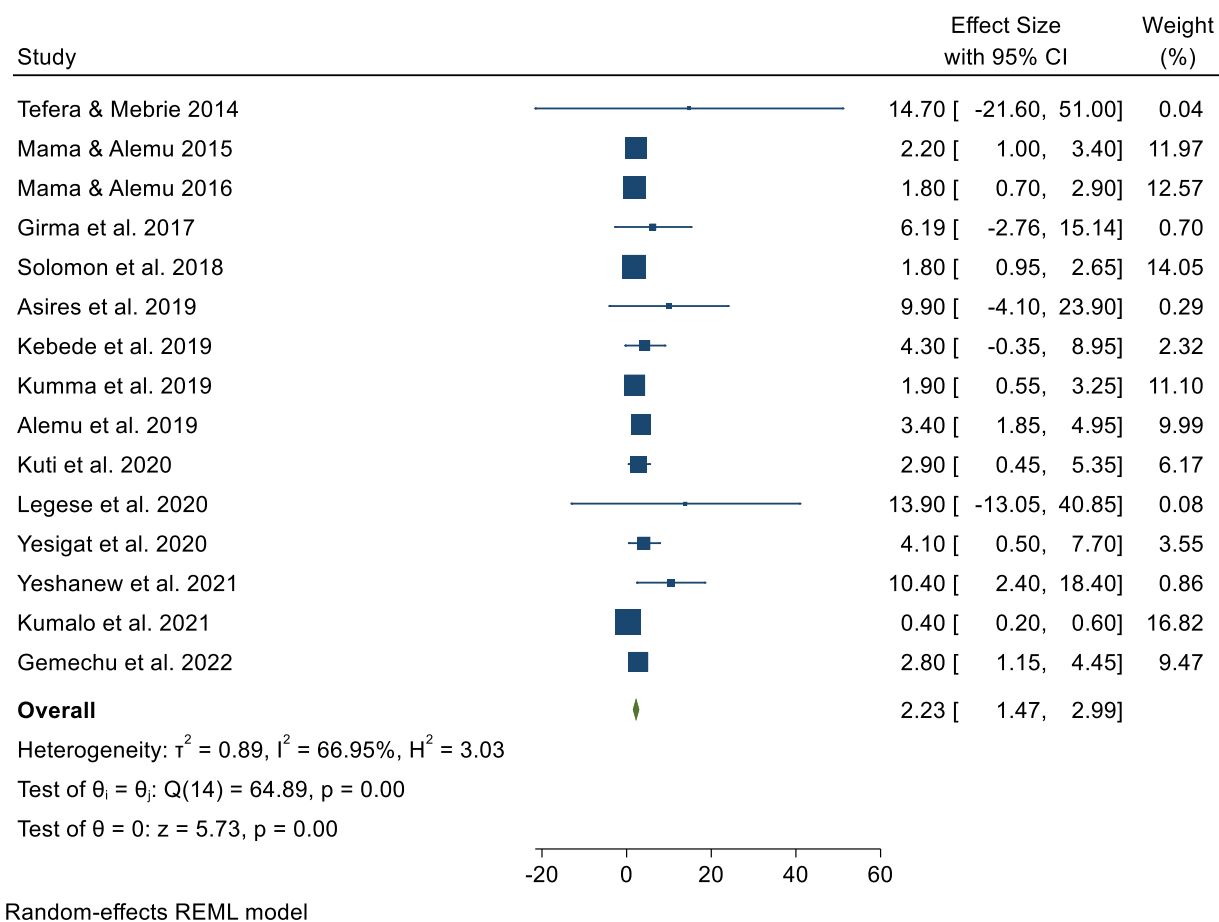

## S5: Fingers nail status as an associated risk factor for IPs and EBIs among food handlers

Supplement: f1 [file 7786036.f1.zip]

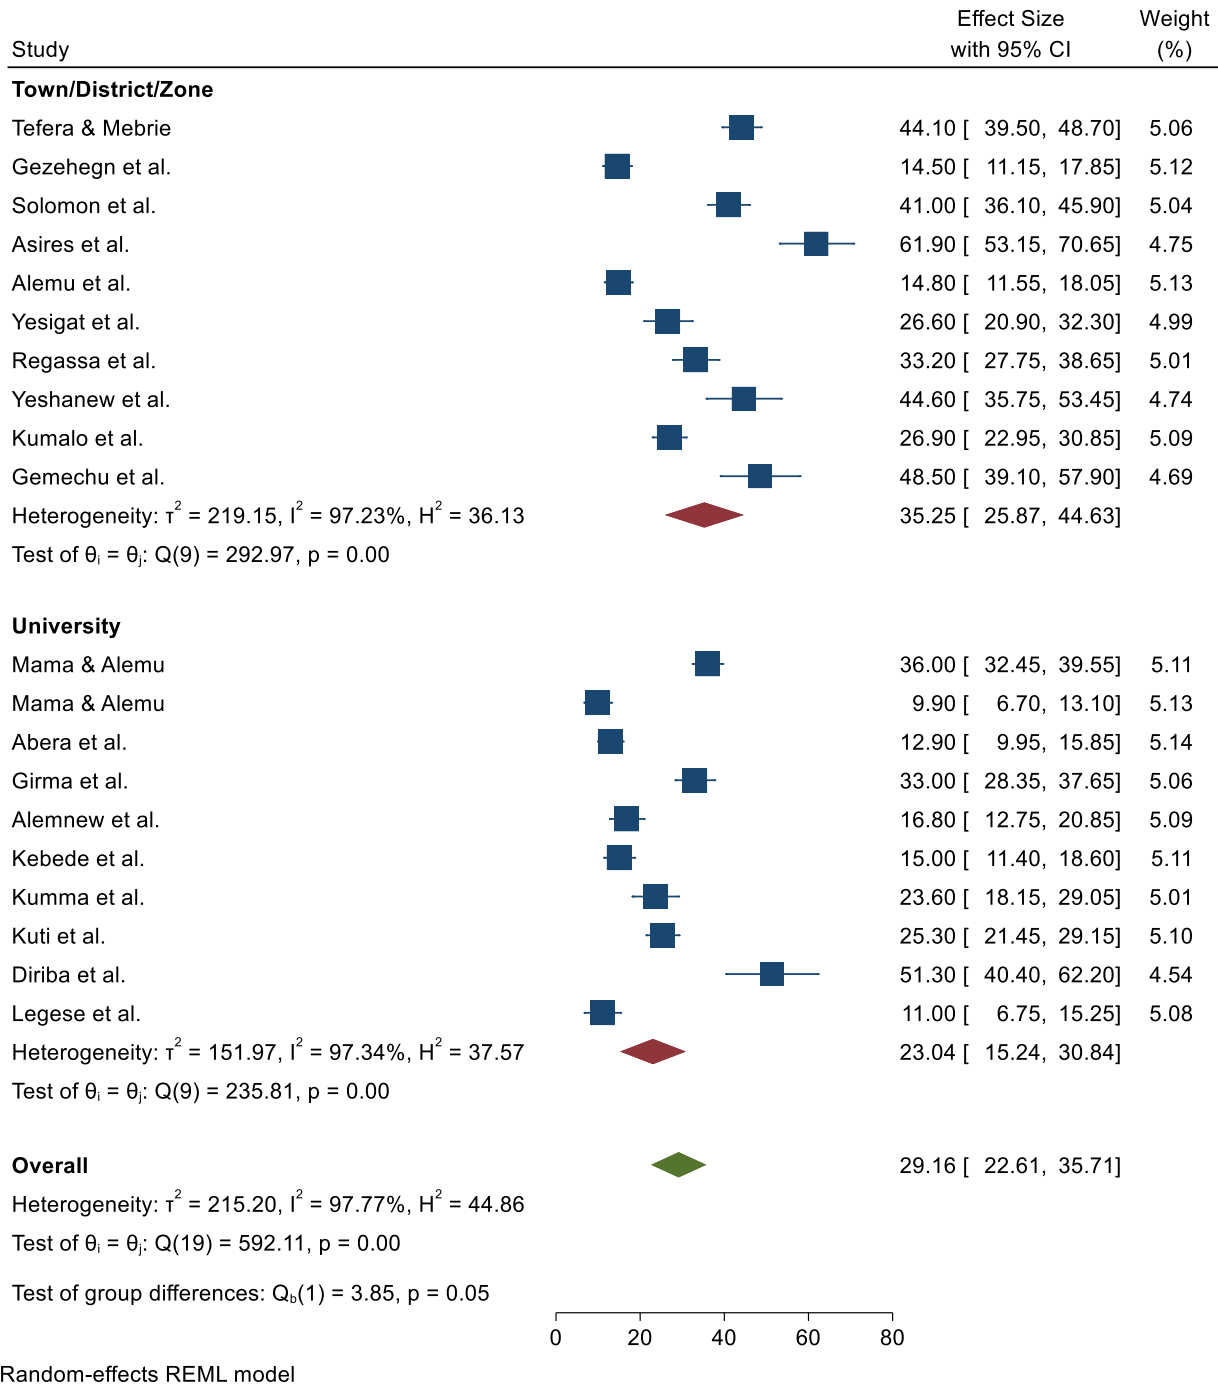

**S3:** Pooled prevalence of IPs and EBIs among food handlers by study area.

Supplement: f1 [file 7786036.f1.zip]

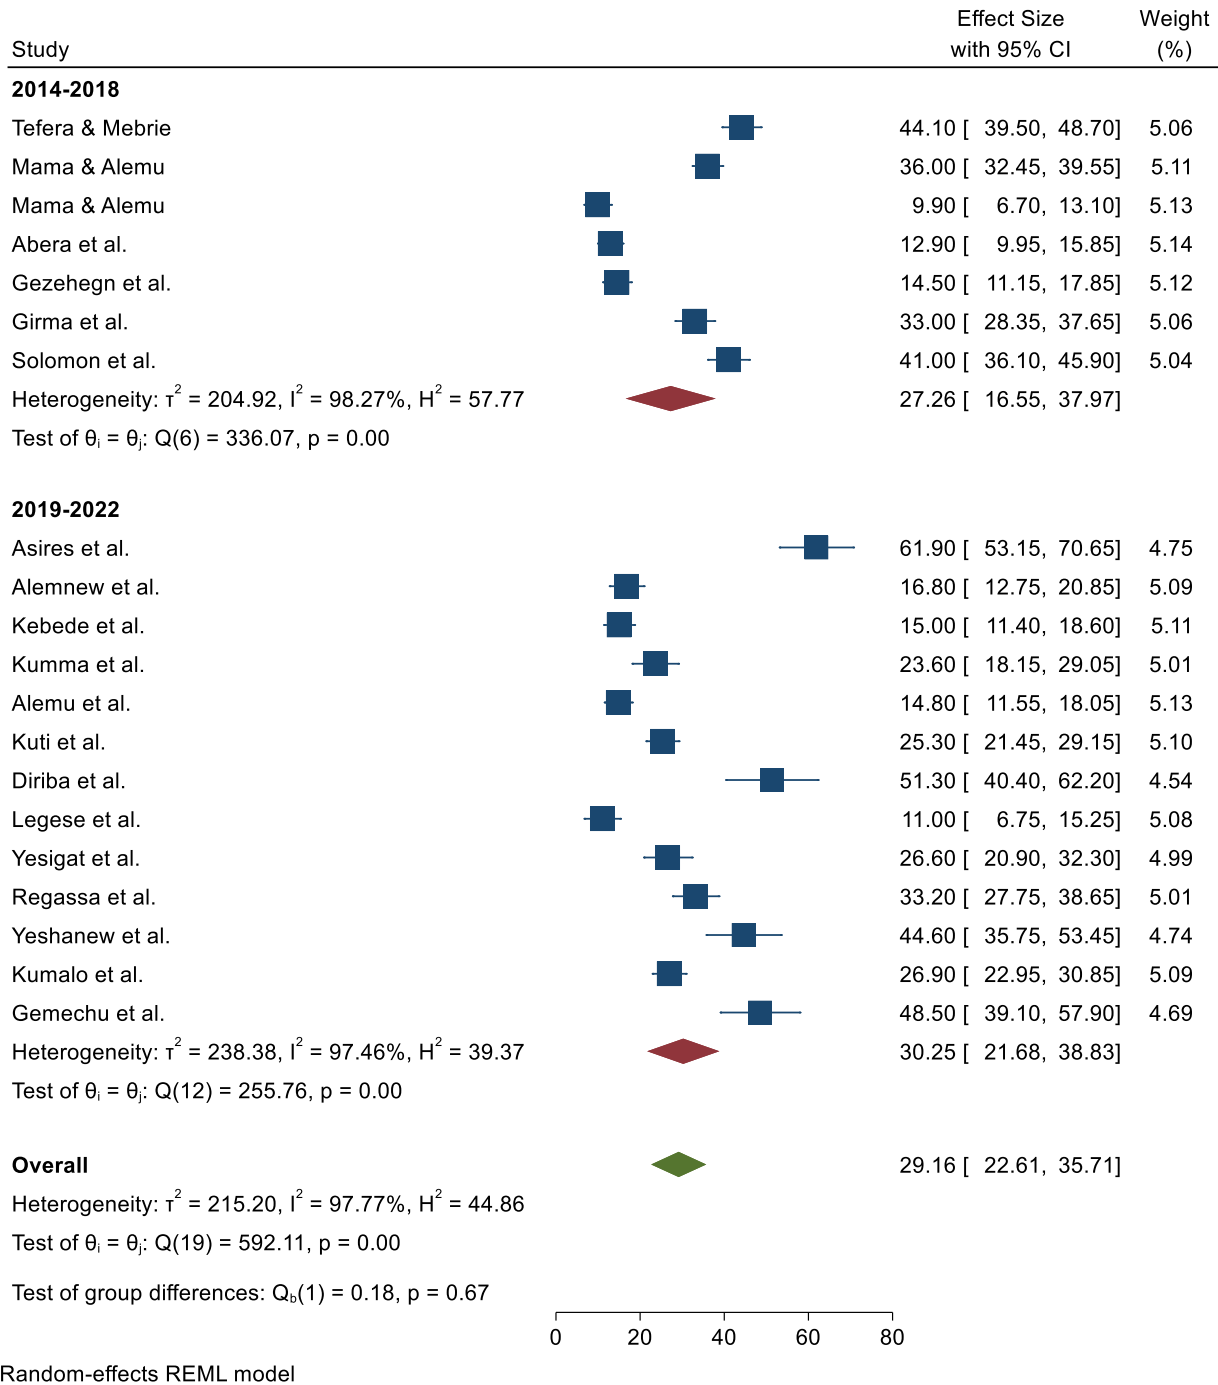

## S2: Pooled prevalence of IPs and EBIs among food handlers from 2019-2022

Supplement: f1 [file 7786036.f1.zip]
